# Supplementary material
Source: Royal Society of Chemistry journal article supplement (doi:10.1039/d6cp00489j)
Supplement: d6cp00489j2.pdf [file d6cp00489j2.pdf]

Supplementary information for  
**Modulating the Band Gaps, Binding Energetics, and Diffusion Kinetics of Black and Blue Phosphorene via K<sup>+</sup> Adsorption: A DFT Study**

Lihua Mu<sup>1,#</sup>, Shiqi Sheng<sup>2,#</sup>, Weijie Kong<sup>1</sup>, and Xiao-Yan Li<sup>3,\*</sup>

<sup>1</sup> *School of Physical Science and Technology, Ningbo University, Ningbo 315211, China;*  
muliuhua@nbu.edu.cn; 115234916160@163.com

<sup>2</sup> *School of Physics, East China University of Science and Technology, Shanghai 200237, China;*

shengshiqi@ecust.edu.cn

<sup>3</sup> *Department of Chemistry, National University of Singapore, 3 Science Drive 3, 117543, Singapore;*

xiaoyanli@nus.edu.sg

# *These authors contributed equally to this work.*

\* Correspondence: xiaoyanli@nus.edu.sg

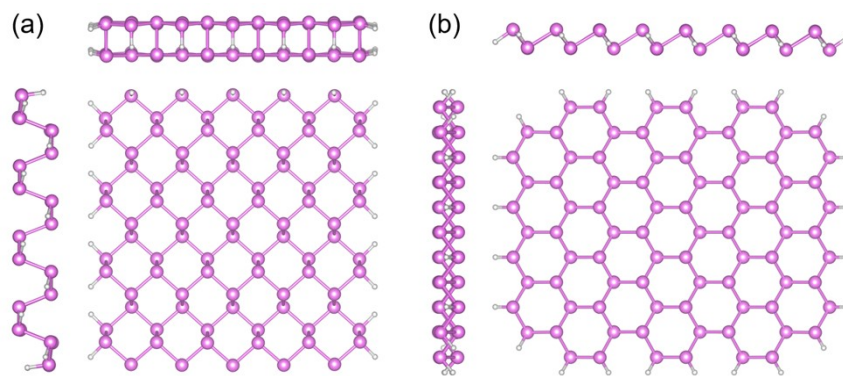

**Figure S1.** The H-terminated (a) 2D-BlackP and (b) 2D-BlueP models used in this study. Spheres in violet, pink, and white represent  $K^+$ , phosphorus, and hydrogen, respectively. The image illustrates that both armchair and zigzag edges are fully passivated with hydrogen atoms (white spheres) to ensure a chemically stable and representative cluster for non-periodic calculations.

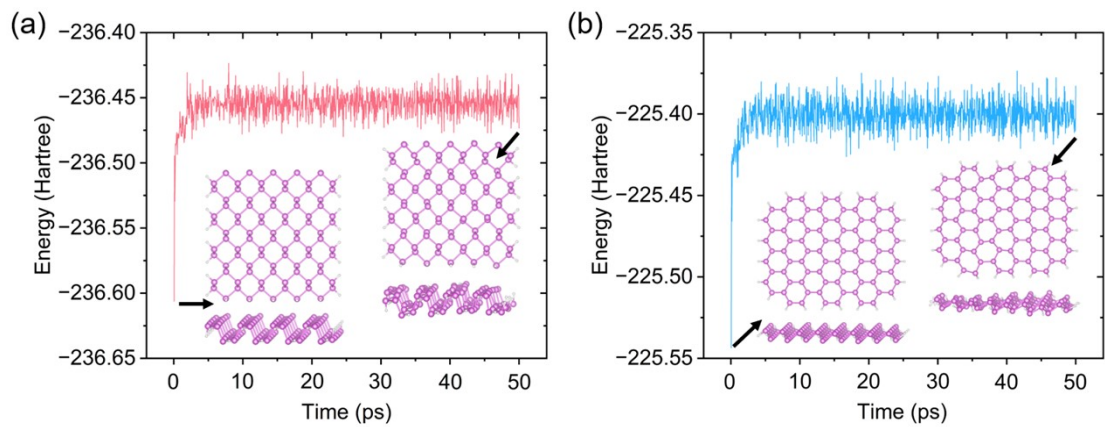

**Figure S2.** Total energy profiles of the (a) 2D-BlackP and (b) 2D-BlueP nanosheets as a function of simulation time obtained from AIMD simulations. The initial configurations at 0 ps and the final configurations at 50 ps are embedded in each panel.

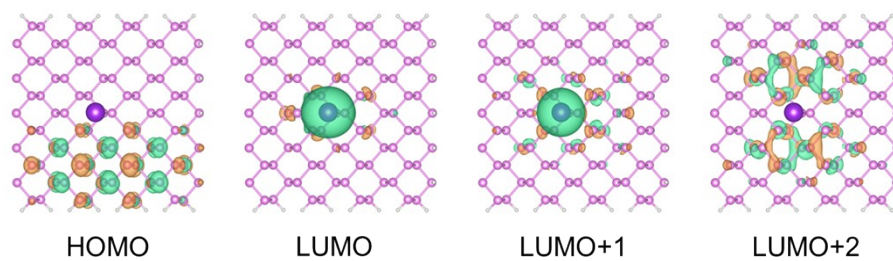

**Figure S3.** Spatial localization of frontier molecular orbitals in  $\text{K}^+@2\text{D-BlackP}$  complex at larger separation distances:  $H = 0.4$  nm. All orbitals predominantly localized on the ion correspond to the p-orbitals of  $\text{K}^+$ . The molecular orbital is plotted for iso-values of  $\pm 0.02$  atomic units, with orange and green denoting opposite signs. Spheres in violet, pink, and white represent  $\text{K}^+$ , phosphorus, and hydrogen, respectively.

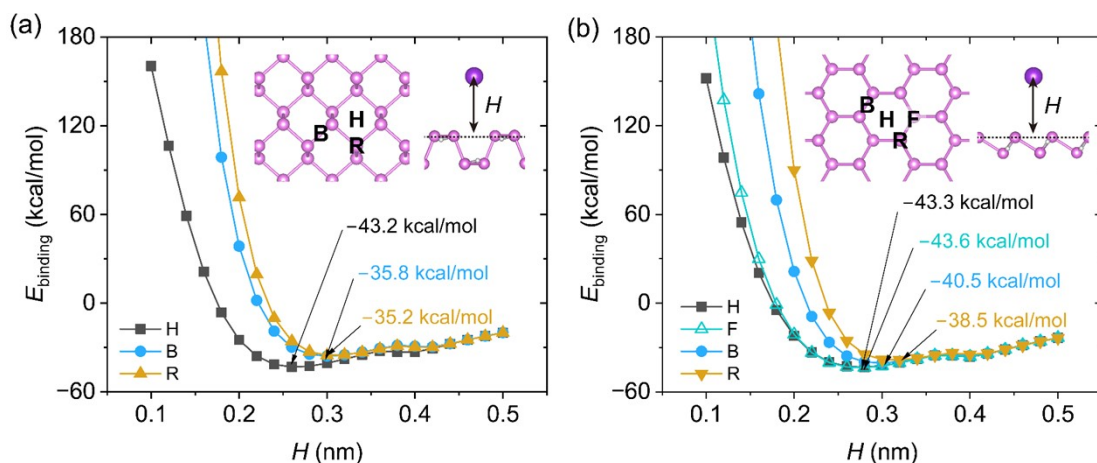

**Figure S4.** Binding energies of (a)  $\text{K}^+$ @2D-BlackP and (b)  $\text{K}^+$ @2D-BlueP complexes at different adsorption sites. For both  $\text{K}^+$ @2D-BlackP and  $\text{K}^+$ @2D-BlueP, three geometrically distinct adsorption sites were considered: (1) above the center of a P hexagon (H site), (2) above the midpoint of a P–P bond (B site), and (3) above a ridge P atom (R site). In addition, for the  $\text{K}^+$ @2D-BlueP complex, a fourth adsorption site was examined, corresponding to  $\text{K}^+$  positioned above a P atom along the furrow (F site).

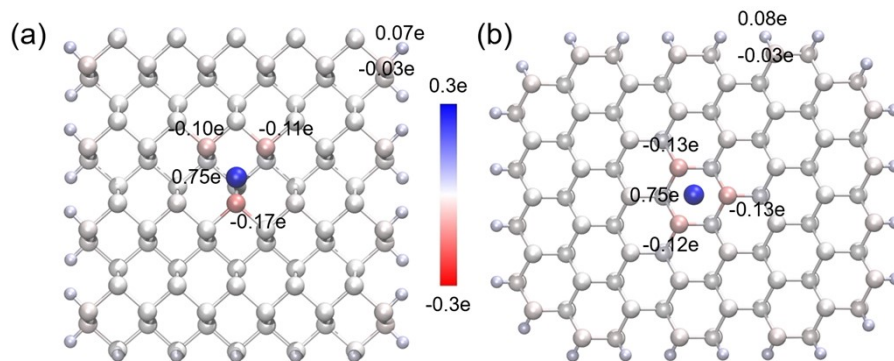

**Figure S5.** Charge distributions of (a)  $K^+@2D\text{-BlackP}$  and (b)  $K^+@2D\text{-BlueP}$  complexes at the minimum relative energy point.

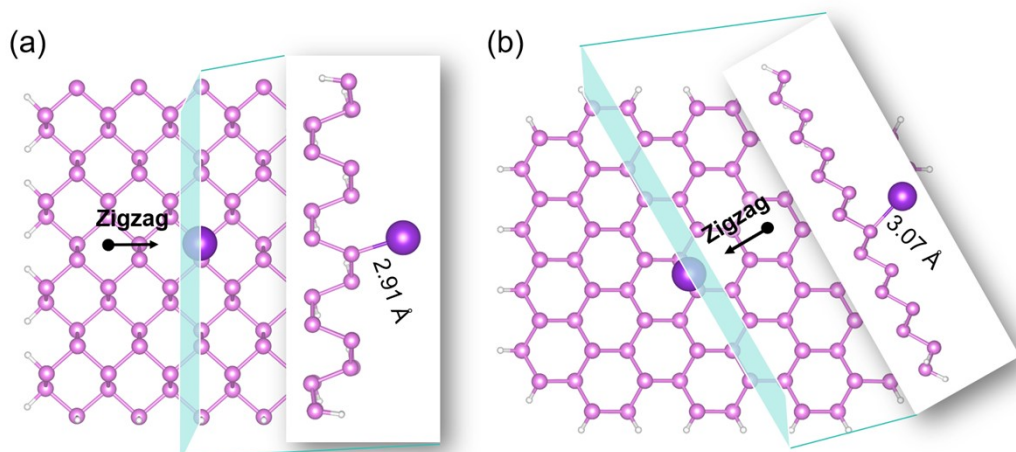

**Figure S6.** Structural configurations at the maximum relative energy point for  $K^+$  ion on the (a) 2D-BlackP and (b) 2D-BlueP sheets along the Zigzag diffusion path. The cross-sectional views highlight the distance between the  $K^+$  cation and the nearest-neighbor phosphorus (P) atoms, illustrating the structural basis for the differing migration barriers.

Table S1. Energetics of various ions adsorbed on black phosphorene.

| Cations                        | Binding energy at hollow site<br>(kcal/mol) | Lowest diffusion energy barrier<br>(eV) |
|--------------------------------|---------------------------------------------|-----------------------------------------|
| K <sup>+</sup> (Current study) | -43.2                                       | 0.09                                    |
| Li <sup>+</sup> <sup>a)</sup>  | -67.9                                       | 0.31                                    |
| Na <sup>+</sup> <sup>a)</sup>  | -54.6                                       | 0.12                                    |
| Mg <sup>2+</sup> <sup>a)</sup> | -250.6                                      | 0.68                                    |
| Ca <sup>2+</sup> <sup>a)</sup> | -187.2                                      | 0.35                                    |

<sup>a)</sup> data taken from reference [*Int. J. Mol. Sci.* 2024, 25, 11841].
